# Supplementary material for: Detectability of the Impacts of Ozone Depleting Substances andGreenhouse Gases upon Stratospheric Ozone Accounting forNonlinearities in Historical Forcings
Source: Copernicus journal article supplement (doi:10.5194/acp-2017-585), 2017-07-14
Supplement: Supplementary file 1 [file acp-2017-585-supplement.pdf]

Supplementary Figures:

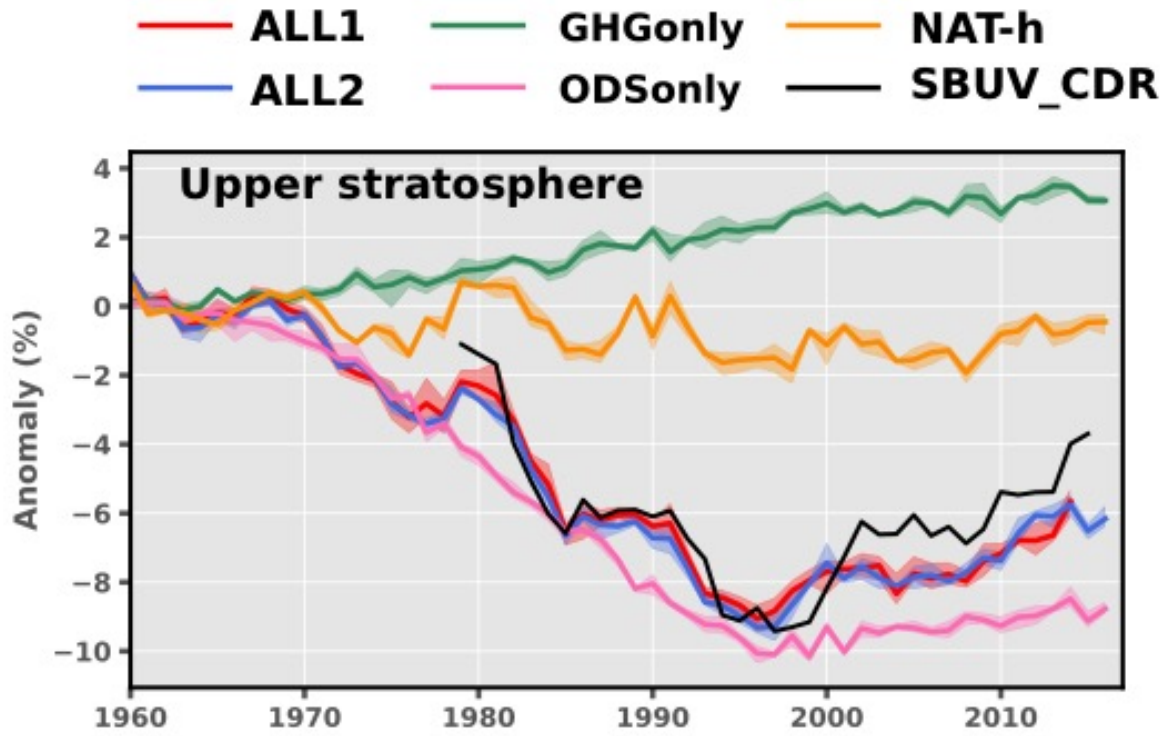

Figure S1: Same as Fig. 1A in the main text, but with the SBUV\_CDR ozone data.

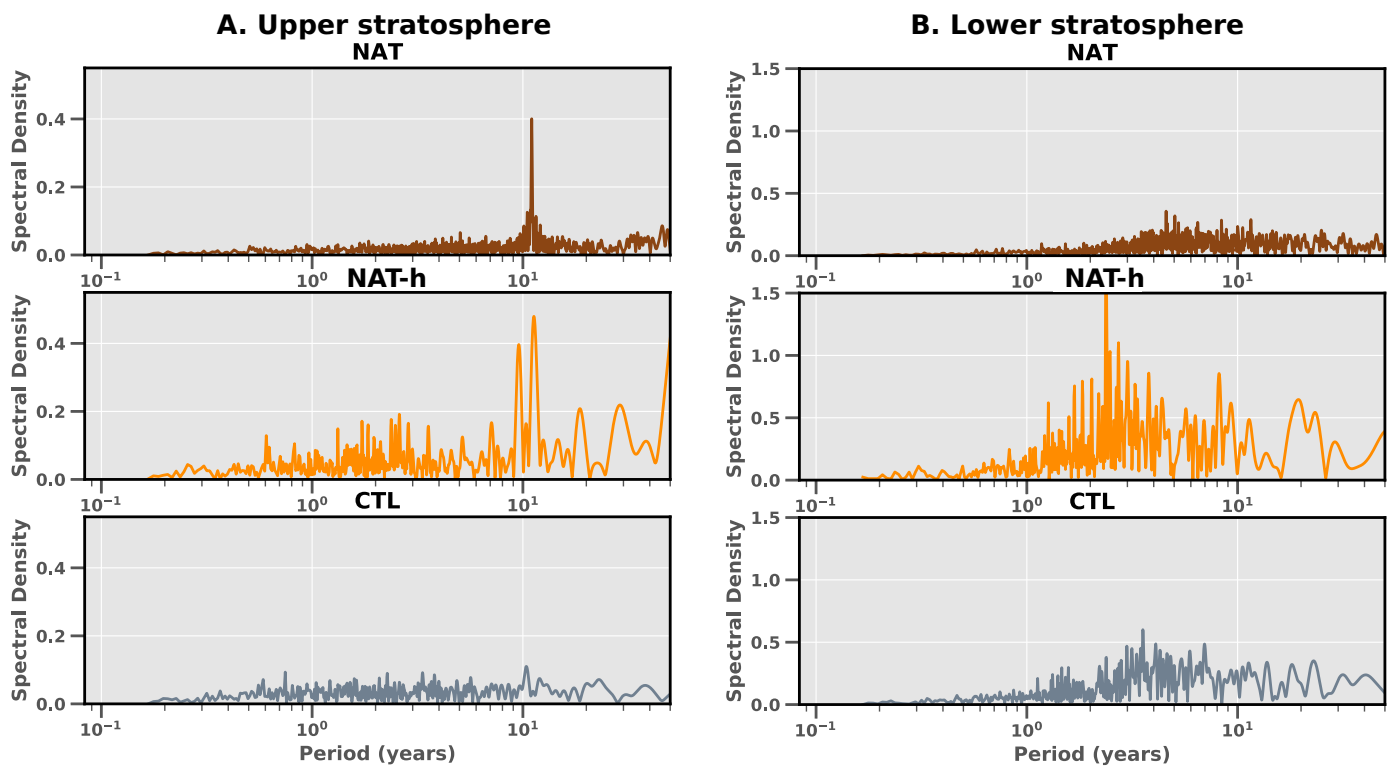

Figure S2: Normalized periodograms of the global stratospheric ozone anomalies shown in Fig 1 and 2 for NAT, NAT-h, and CTL. The power spectra were calculated using monthly anomalies.

## SBUV\_CDR

### A. Linear trends, 1979-2015

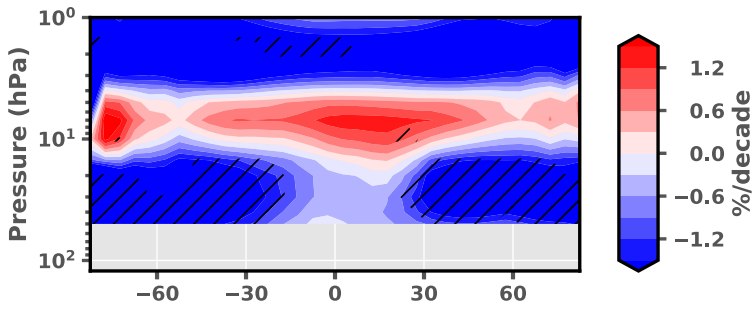

### B. EESC trends, 1979-2015

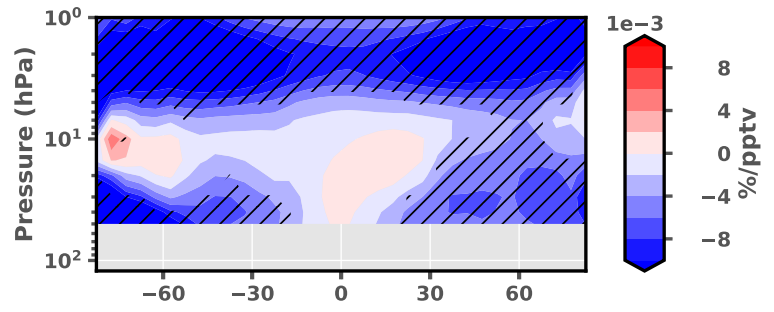

Figure S3: Same as Fig. 4A in the main text but with SBUV-Cohesive ozone dataset.

### SBUV\_CDR Upper Stratosphere

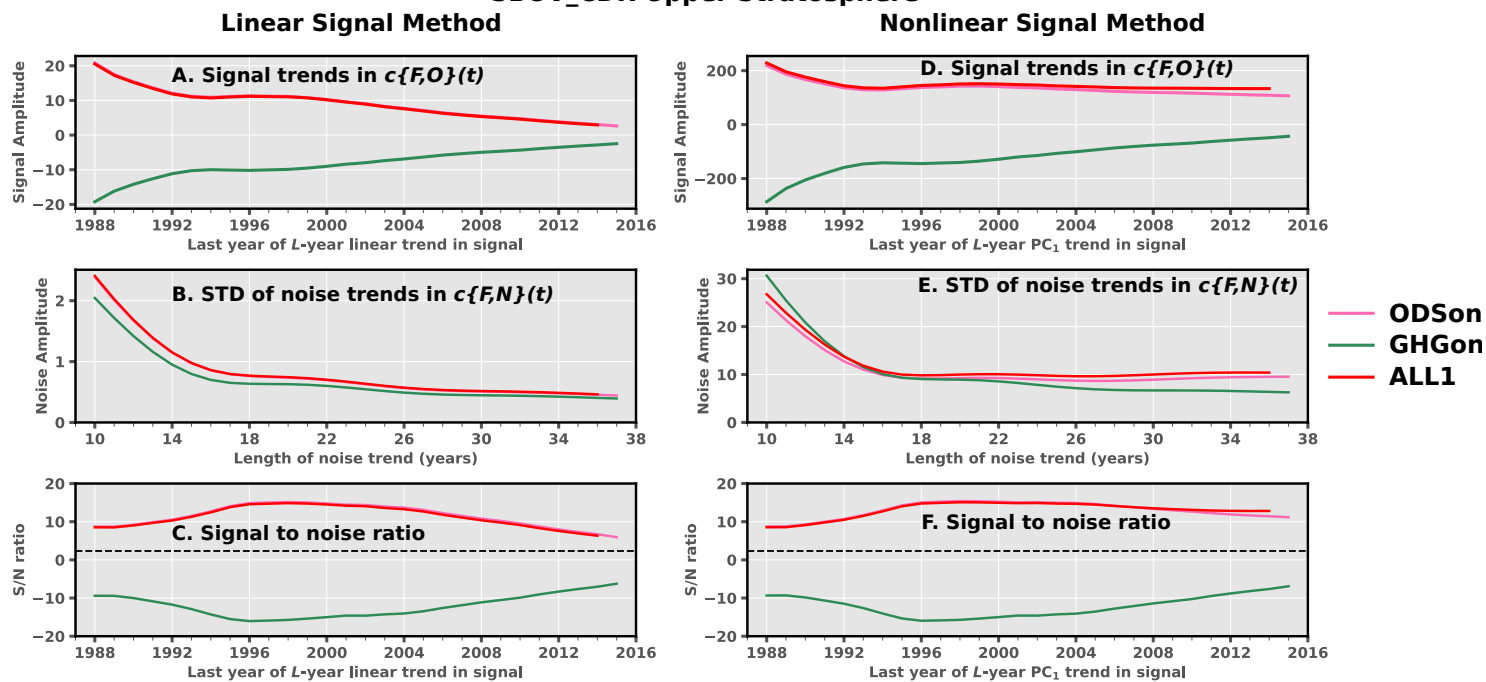

Figure S4: Same as Fig. 7 in the main text showing S/N estimates for the upper stratosphere, 1 to 10 hPa, but with SBUV\_CDR ozone dataset instead of SWOOSH.
